# Supplementary material for: Prediction of biphasic separation in CO2 absorption using a molecular surface information-based machine learning model
Source: Royal Society of Chemistry journal article supplement (doi:10.1039/d2em00253a), 2022-01-01
Supplement: d2em00253a1.pdf [file d2em00253a1.pdf]

## Supporting information

### Prediction of biphasic separation on CO<sub>2</sub> absorption using molecular surface information-based machine learning model

*Taishi Kataoka, Yingquan Hao, Ying Chieh Hung, Yasuhiko Orita, Yusuke Shimoyama\**

Department of Chemical Science and Engineering, Tokyo Institute of Technology, 2-12-1 S1-33, Ookayama,

Meguro-ku, Tokyo 152-8550, Japan

\*For correspondence: [yshimo@chemeng.titech.ac.jp](mailto:yshimo@chemeng.titech.ac.jp), TEL & FAX : +81 3 5734 3285

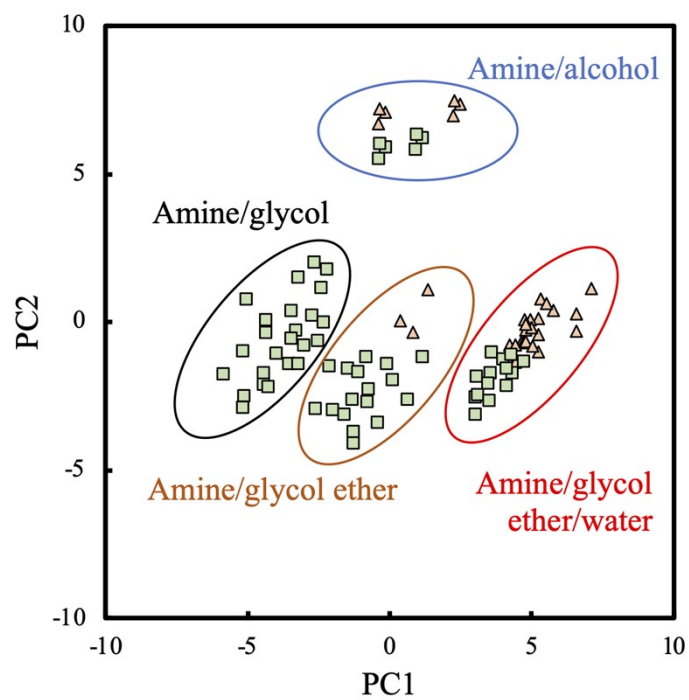

**Fig. S1** Scatter plots of the first and second principal components. (■): Homogeneous phase, (△): Phase separated.

**Table S1.** All pairs of solvents in the dataset of mixed-solvent absorbents.

| Amine | Organic solvent | Water | Type     | Dataset <sup>a</sup> | Data source |
|-------|-----------------|-------|----------|----------------------|-------------|
| IPMEA | DEGDEE          | -     | Miscible | Training             | S1          |
| BAE   | DEGDEE          | -     | Miscible | Training             | S1          |
| BZMEA | DEGDEE          | -     | Miscible | Test                 | S1          |
| EAE   | DEGDME          | -     | Miscible | Test                 | S1          |
| IPMEA | DEGDME          | -     | Miscible | Training             | S1          |
| BAE   | DEGDME          | -     | Miscible | Training             | S1          |
| BZMEA | DEGDME          | -     | Miscible | Training             | S1          |
| MAE   | DEGMEE          | -     | Miscible | Test                 | S1          |
| EAE   | DEGMEE          | -     | Miscible | Test                 | S1          |
| IPMEA | DEGMEE          | -     | Miscible | Training             | S1          |
| BAE   | DEGMEE          | -     | Miscible | Test                 | S1          |
| BZMEA | DEGMEE          | -     | Miscible | Training             | S1          |
| MPA   | DEGMEE          | -     | Miscible | Training             | S1          |
| AM2B  | DEGMEE          | -     | Miscible | Training             | S1          |
| AM2P  | DEGMEE          | -     | Miscible | Test                 | S1          |
| MAE   | DEGMME          | -     | Miscible | Test                 | S1          |
| EAE   | DEGMME          | -     | Miscible | Test                 | S1          |
| IPMEA | DEGMME          | -     | Miscible | Training             | S1          |
| BAE   | DEGMME          | -     | Miscible | Training             | S1          |
| BZMEA | DEGMME          | -     | Miscible | Test                 | S1          |
| MPA   | DEGMME          | -     | Miscible | Test                 | S1          |
| AM2B  | DEGMME          | -     | Miscible | Test                 | S1          |
| AM2P  | DEGMME          | -     | Miscible | Test                 | S1          |
| MAE   | EGBE            | -     | Miscible | Test                 | S1          |
| EAE   | EGBE            | -     | Miscible | Test                 | S1          |
| IPMEA | EGBE            | -     | Miscible | Training             | S1          |
| BAE   | EGBE            | -     | Miscible | Training             | S1          |
| BZMEA | EGBE            | -     | Miscible | Training             | S1          |
| MPA   | EGBE            | -     | Miscible | Training             | S1          |
| AM2B  | EGBE            | -     | Miscible | Test                 | S1          |
| AM2P  | EGBE            | -     | Miscible | Training             | S1          |
| MEA   | Octanol         | -     | Biphasic | Test                 | S2          |

|      |             |         |            |          |    |
|------|-------------|---------|------------|----------|----|
| MEA  | Heptanol    | -       | Biphasic   | Training | S2 |
| MEA  | Isoocatanol | -       | Biphasic   | Test     | S2 |
| MAE  | DEGDEE      | -       | Biphasic   | Test     | S1 |
| MAE  | DEGDME      | -       | Biphasic   | Training | S1 |
| EAE  | DEGDEE      | -       | Biphasic   | Training | S1 |
| DEA  | Octanol     | -       | Biphasic   | Training | S2 |
| DEA  | Heptanol    | -       | Biphasic   | Test     | S2 |
| DEA  | Isoocatanol | -       | Biphasic   | Test     | S2 |
| BAE  | DEGDEE      | Contain | Miscible   | Training | S3 |
| BAE  | DEGEME      | Contain | Miscible   | Training | S4 |
| BAE  | DEGDME      | Contain | Miscible   | Training | S4 |
| AMB  | DEGDEE      | Contain | Miscible   | Test     | S3 |
| AMB  | DEGEME      | Contain | Miscible   | Training | S4 |
| AMB  | DEGDME      | Contain | Miscible   | Training | S4 |
| AM2P | DEGDEE      | Contain | Immiscible | Training | S3 |
| MAE  | DEGDEE      | Contain | Immiscible | Test     | S4 |
| AEE  | DEGDEE      | Contain | Immiscible | Test     | S3 |
| AEE  | DEGEME      | Contain | Immiscible | Test     | S4 |
| MEA  | DEGDEE      | Contain | Immiscible | Training | S3 |
| MEA  | DEGEME      | Contain | Immiscible | Test     | S4 |
| MEA  | DEGDME      | Contain | Immiscible | Test     | S4 |
| EAE  | DEGDEE      | Contain | Biphasic   | Test     | S3 |
| EAE  | DEGEME      | Contain | Biphasic   | Test     | S4 |
| EAE  | DEGDME      | Contain | Biphasic   | Training | S4 |
| AM2P | DEGEME      | Contain | Biphasic   | Training | S4 |
| AM2P | DEGDME      | Contain | Biphasic   | Training | S4 |
| MAE  | DEGEME      | Contain | Biphasic   | Training | S4 |
| MAE  | DEGDME      | Contain | Biphasic   | Test     | S4 |
| AEE  | DEGDME      | Contain | Biphasic   | Test     | S4 |

---

<sup>a</sup> Classified into training or test sets by DS-known

**Table S2.** Ranges of hyperparameters in each model

| Model | Parameters <sup>a</sup> | Range      |
|-------|-------------------------|------------|
| RF    | n_estimators            | 100        |
|       | max_depth               | 1–7        |
|       | min_samples_split       | 3–20       |
| LGR   | <i>C</i>                | 0.125–1024 |
|       | penalty                 | L2 norm    |
| SVM   | <i>C</i>                | 0.125–1024 |
|       | penalty                 | L2 norm    |

<sup>a</sup> Name of parameters in scikit-learn library. n\_estimators is number of trees in forest, max\_depth is maximum depth of trees, min\_samples\_split is minimum number of samples required to split an internal node, *C* is regularization parameter, and penalty is regularization term.

**Table S3.** Confusion matrix that summarizes prediction results for phase states by (a) RF, (b) LGR, and (c) SVM models using DS-unknown.

(a) RF

|                     |            | <b>Predicted class</b> |            |
|---------------------|------------|------------------------|------------|
|                     |            | Miscible               | Immiscible |
| <b>Actual class</b> | Miscible   | 89                     | 2          |
|                     | Immiscible | 8                      | 23         |

(b) LGR

|                     |            | <b>Predicted class</b> |            |
|---------------------|------------|------------------------|------------|
|                     |            | Miscible               | Immiscible |
| <b>Actual class</b> | Miscible   | 87                     | 4          |
|                     | Immiscible | 3                      | 28         |

(c) SVM

|                     |            | <b>Predicted class</b> |            |
|---------------------|------------|------------------------|------------|
|                     |            | Miscible               | Immiscible |
| <b>Actual class</b> | Miscible   | 85                     | 6          |
|                     | Immiscible | 3                      | 28         |

**Table S4.** Confusion matrix that summarizes prediction results for phase states in test sets by (a) RF, (b) LGR, and (c) SVM models using DS-known.

(a) RF

|                     |            | <b>Predicted class</b> |            |
|---------------------|------------|------------------------|------------|
|                     |            | Miscible               | Immiscible |
| <b>Actual class</b> | Miscible   | 40                     | 1          |
|                     | Immiscible | 1                      | 18         |

(b) LGR

|                     |            | <b>Predicted class</b> |            |
|---------------------|------------|------------------------|------------|
|                     |            | Miscible               | Immiscible |
| <b>Actual class</b> | Miscible   | 40                     | 1          |
|                     | Immiscible | 1                      | 18         |

(c) SVM

|                     |            | <b>Predicted class</b> |            |
|---------------------|------------|------------------------|------------|
|                     |            | Miscible               | Immiscible |
| <b>Actual class</b> | Miscible   | 36                     | 5          |
|                     | Immiscible | 0                      | 19         |

**Table S5.** Experimental and predicted phase behaviors<sup>a</sup>.

| Amine | Organic solvent | Water | Prediction for DS-known <sup>b</sup> | Prediction for DS-unknown <sup>b</sup> |
|-------|-----------------|-------|--------------------------------------|----------------------------------------|
| IPMEA | DEGDEE          | -     | Miscible                             | Miscible                               |
| BAE   | DEGDEE          | -     | Miscible                             | Miscible                               |
| BZMEA | DEGDEE          | -     | Miscible                             | Miscible                               |
| EAE   | DEGDME          | -     | Miscible                             | Miscible                               |
| IPMEA | DEGDME          | -     | Miscible                             | Miscible                               |
| BAE   | DEGDME          | -     | Miscible                             | Miscible                               |
| BZMEA | DEGDME          | -     | Miscible                             | Miscible                               |
| MAE   | DEGMEE          | -     | Miscible                             | <b>Biphasic</b> ( <i>Miscible</i> )    |
| EAE   | DEGMEE          | -     | Miscible                             | Miscible                               |
| IPMEA | DEGMEE          | -     | Miscible                             | Miscible                               |
| BAE   | DEGMEE          | -     | Miscible                             | Miscible                               |
| BZMEA | DEGMEE          | -     | Miscible                             | Miscible                               |
| MPA   | DEGMEE          | -     | Miscible                             | Miscible                               |
| AM2B  | DEGMEE          | -     | Miscible                             | Miscible                               |
| AM2P  | DEGMEE          | -     | Miscible                             | Miscible                               |
| MAE   | DEGMME          | -     | Miscible                             | Miscible                               |
| EAE   | DEGMME          | -     | Miscible                             | Miscible                               |
| IPMEA | DEGMME          | -     | Miscible                             | Miscible                               |
| BAE   | DEGMME          | -     | Miscible                             | Miscible                               |
| BZMEA | DEGMME          | -     | Miscible                             | Miscible                               |
| MPA   | DEGMME          | -     | Miscible                             | Miscible                               |
| AM2B  | DEGMME          | -     | Miscible                             | Miscible                               |
| AM2P  | DEGMME          | -     | Miscible                             | Miscible                               |
| MAE   | EGBE            | -     | Miscible                             | <b>Biphasic</b> ( <i>Miscible</i> )    |
| EAE   | EGBE            | -     | Miscible                             | Miscible                               |
| IPMEA | EGBE            | -     | Miscible                             | Miscible                               |
| BAE   | EGBE            | -     | Miscible                             | Miscible                               |
| BZMEA | EGBE            | -     | Miscible                             | Miscible                               |
| MPA   | EGBE            | -     | Miscible                             | Miscible                               |
| AM2B  | EGBE            | -     | Miscible                             | Miscible                               |
| AM2P  | EGBE            | -     | Miscible                             | Miscible                               |
| MEA   | Octanol         | -     | Biphasic                             | Biphasic                               |



|      |            |         |                                       |                                       |
|------|------------|---------|---------------------------------------|---------------------------------------|
| MEA  | Heptanol   | -       | Biphasic                              | Biphasic                              |
| MEA  | Isocatanol | -       | Biphasic                              | Biphasic                              |
| MAE  | DEGDEE     | -       | Biphasic                              | Biphasic                              |
| MAE  | DEGDME     | -       | Biphasic                              | Biphasic                              |
| EAE  | DEGDEE     | -       | Biphasic                              | Biphasic                              |
| DEA  | Octanol    | -       | Biphasic                              | Biphasic                              |
| DEA  | Heptanol   | -       | Biphasic                              | Biphasic                              |
| DEA  | Isocatanol | -       | Biphasic                              | Biphasic                              |
| BAE  | DEGDEE     | Contain | Miscible                              | Miscible                              |
| BAE  | DEGEME     | Contain | Miscible                              | Miscible                              |
| BAE  | DEGDME     | Contain | Miscible                              | Miscible                              |
| AMB  | DEGDEE     | Contain | Miscible                              | Miscible                              |
| AMB  | DEGEME     | Contain | Miscible                              | Miscible                              |
| AMB  | DEGDME     | Contain | Miscible                              | Miscible                              |
| AM2P | DEGDEE     | Contain | Immiscible                            | <b>Biphasic</b> ( <i>Immiscible</i> ) |
| MAE  | DEGDEE     | Contain | <b>Biphasic</b> ( <i>Immiscible</i> ) | <b>Biphasic</b> ( <i>Immiscible</i> ) |
| AEE  | DEGDEE     | Contain | Immiscible                            | Immiscible                            |
| AEE  | DEGEME     | Contain | Immiscible                            | Immiscible                            |
| MEA  | DEGDEE     | Contain | Immiscible                            | Immiscible                            |
| MEA  | DEGEME     | Contain | Immiscible                            | Immiscible                            |
| MEA  | DEGDME     | Contain | Immiscible                            | Immiscible                            |
| EAE  | DEGDEE     | Contain | Biphasic                              | Biphasic                              |
| EAE  | DEGEME     | Contain | Biphasic                              | <b>Miscible</b> ( <i>Biphasic</i> )   |
| EAE  | DEGDME     | Contain | Immiscible                            | Immiscible                            |
| AM2P | DEGEME     | Contain | Immiscible                            | Immiscible                            |
| AM2P | DEGDME     | Contain | Immiscible                            | Immiscible                            |
| MAE  | DEGEME     | Contain | Immiscible                            | Immiscible                            |
| MAE  | DEGDME     | Contain | Immiscible                            | Immiscible                            |
| AEE  | DEGDME     | Contain | <b>Immiscible</b> ( <i>Biphasic</i> ) | <b>Immiscible</b> ( <i>Biphasic</i> ) |

Experimental data source as well as those in Table S1

<sup>a</sup> Predicted phase behaviors by LGR model.

<sup>b</sup> Bold letters: Prediction result was wrong, brackets: actual phase behavior (correct answer)

## REFERENCES

(S1) Barzagli, F.; Mani, F.; Peruzzini, M. Novel Water-Free Biphasic Absorbents for Efficient CO<sub>2</sub> Capture.

*Int. J. Greenh. Gas Control.* **2017**, 60, 100–109. <https://doi.org/10.1016/j.ijggc.2017.03.010>.

(S2) Kim, Y. E.; Park, J. H.; Yun, S. H.; Nam, S. C.; Jeong, S. K.; Yoon, Y. Il. Carbon Dioxide Absorption

Using a Phase Transitional Alkanolamine-Alcohol Mixture. *J. Ind. Eng. Chem.* **2014**, 20 (4), 1486–1492.

<https://doi.org/10.1016/j.jiec.2013.07.036>.

(S3) Machida, H.; Oba, K.; Tomikawa, T.; Esaki, T.; Yamaguchi, T.; Horizoe, H. Development of Phase

Separation Solvent for CO<sub>2</sub> Capture by Aqueous (Amine + Ether) Solution. *J. Chem. Thermodyn.* **2017**, 113,

64–70. <https://doi.org/10.1016/j.jct.2017.05.043>.

(S4) Nakaoka, M.; Tran, K. V. B.; Yanase, K.; Machida, H.; Norinaga, K. Prediction of Phase Behavior of

CO<sub>2</sub> Absorbents Using Conductor-like Screening Model for Real Solvents (COSMO-RS): An Approach to

Identify Phase Separation Solvents of Amine/Ether/Water Systems upon CO<sub>2</sub> Absorption. *Ind. Eng. Chem.*

*Res.* **2020**, 59 (42), 19020–19029. <https://doi.org/10.1021/acs.iecr.0c03233>.
